# Supplementary material for: Neuropathy and neural plasticity in the subcutaneous white adipose depot
Source: PLoS One. 2019 Sep 11;14(9):e0221766. doi: 10.1371/journal.pone.0221766 (PMC6738614; doi:10.1371/journal.pone.0221766)
Supplement: S6 Table — (XLSX) [file pone.0221766.s006.xlsx]

## Sheet: Sheet1
Peptide/protein target	Antigen sequence (if known)	Name of Antibody	Manufacturer, catalog #, and/or name of individual providing the antibody	Clone Name	Lot # for polyclonal antibodies	Species raised in; monoclonal or polyclonal	Dilution used	RRID	Citation for Antibody validation	Reference to antibody validation profile	Data we included in Supplement demonstrating utility in the system under study	NOTES
Tyrosine hydroxylase	Not provided by vendor	Anti-Tyrosine Hydroxylase Antibody	Millipore Cat. # AB152	N/A	2493925	rabbit polyclonal	1:1000 (WB)	AB_2201528	doi:10.1038/nm.4316	https://www.citeab.com/antibodies/222941-ab152-anti-tyrosine-hydroxylase-antibody	N/A	We did obtain TH-KO tissues from Christoph Buettner and ran alongside our adipose samples with this antibody - our band at 62kD looks the same in his KO samples demonstrated in their published blots
beta-tubulin	Not provided by vendor	Anti-beta- Tubulin antibody	Cell Signaling #2146	N/A	7	rabbit polyclonal	1:1000 (WB)	AB_2210545	N/A	https://www.antibodypedia.com/gene/48344/TUBB/antibody/105566/2146 , https://www.cellsignal.com/products/primary-antibodies/b-tubulin-antibody/2146	N/A
PGP9.5	Not provided by vendor	Anti-PGP9.5 antibody	Abcam Cat. # 10404	N/A	GR314512-3	rabbit polyclonal	1:1000 (WB); 1:1000 (IF)	AB_297145	N/A	https://www.citeab.com/antibodies/746051-ab10404-anti-pgp9-5-antibody , http://www.abcam.com/pgp95-antibody-ab10404.html	N/A
PGP9.5	Not provided by vendor	Anti-PGP9.5 antibody	Abcam Cat. # 108986	EPR4118	GR308353-13	rabbit monclonal	1:500 (WB); 1:250 (IF);	AB_10891773	abcam KO Validated	http://www.abcam.com/pgp95-antibody-epr4118-ab108986.html,
beta-actin	Not provided by vendor	Anti-beta-actin antibody	Abcam Cat. # ab8227	N/A	GR297394-1	rabbit polyclonal	1:1000 (WB)	AB_2305186	N/A	https://www.citeab.com/antibodies/714020-ab8227-anti-beta-actin-antibody , http://www.abcam.com/beta-actin-antibody-ab8227.html	N/A
cyclophilin b	Not provided by vendor	Anit-cyclophilin b antibody	Abcam Cat # 16045	N/A	GR266128-1	rabbit polyclonal	1:1000 (WB)	AB_443295	doi: 10.1210/en.2015-1618	https://www.citeab.com/antibodies/1892937-ab16045-anti-cyclophilin-b-antibody , http://www.abcam.com/cyclophilin-b-antibody-ab16045.html	N/A
Tubulin (beta III)	Not provided by vendor	6G7	Developmental Studies Hybridoma Bank, 6G7	6G7	N/A	mouse monoclonal	1:250 (IF)	AB_528497	N/A	https://www.citeab.com/antibodies/149886-6g7-tubb3-antibody-6g7	N/A
Neurofilament M	Not provided by vendor	2H3	Developmental Studies Hybridoma Bank, 6G7	2H3	N/A	mouse monoclonal	1:500 (IF)	AB_531793	N/A	https://www.citeab.com/antibodies/149748-2h3-neurofilament-nf-m-antibody-2h3	N/A
Synaptic Vesicles	Not provided by vendor	SV2	Developmental Studies Hybridoma Bank, 6G7	SV2	N/A	mouse monoclonal	1:250 (IF)	AB_2315387	N/A	https://www.citeab.com/antibodies/150212-sv2-sv2a-antibody-sv2	N/A
PSD9.5	Not provided by vendor	Anti-PSD95 antibody	Abcam Cat # ab18258	N/A	GR3184236-1	rabbit polyclonal	1:1000 (IF); 1:750 (WB);	AB_444362	N/A	http://www.abcam.com/psd95-antibody-ab18258.html	N/A
GAP43	Not provided by vendor	Anti-GAP-43 antibody	Novus Cat. # NB300-143	N/A	11917	rabbit polyclonal	1:10000 (WB);	AB_10001196	Novus Validated	https://www.citeab.com/antibodies/408174-nb300-143-gap-43-antibody-rabbit-polyclonal?des=98F2E81CB49A724C	N/A
